# Supplementary material
Source: PubMed Central journal article supplement (PMC7042065)

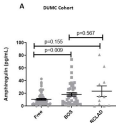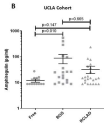

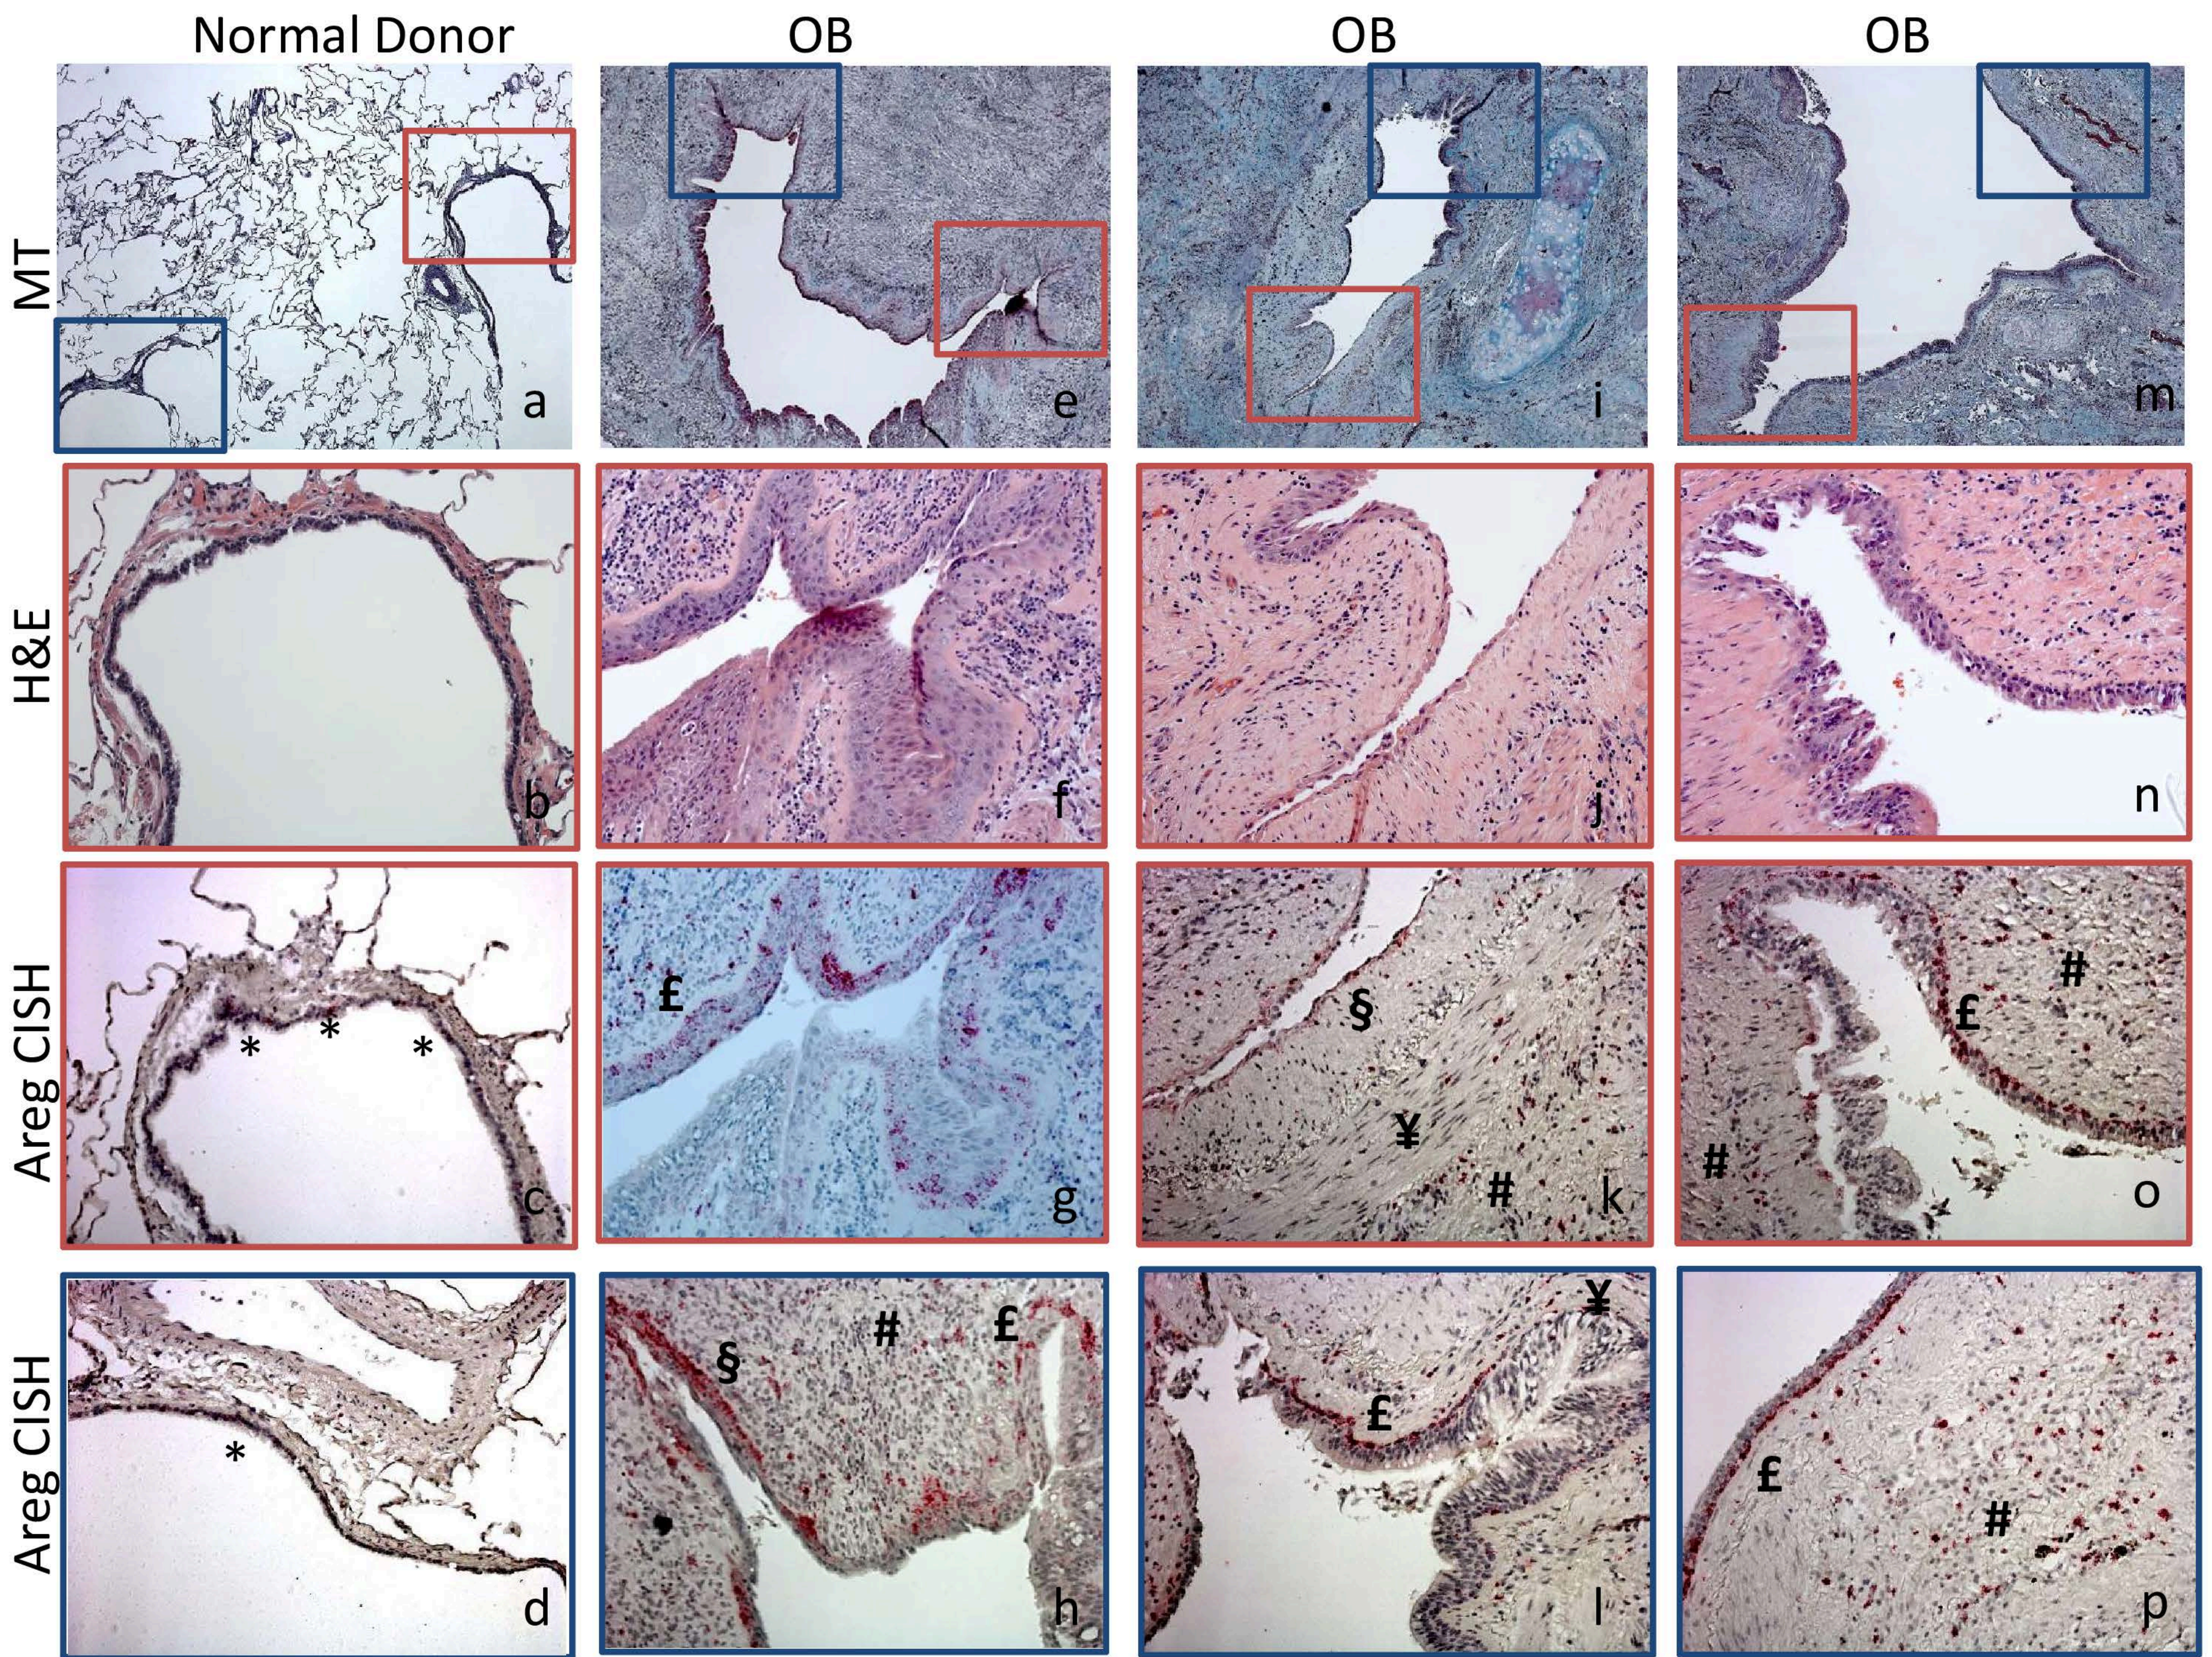

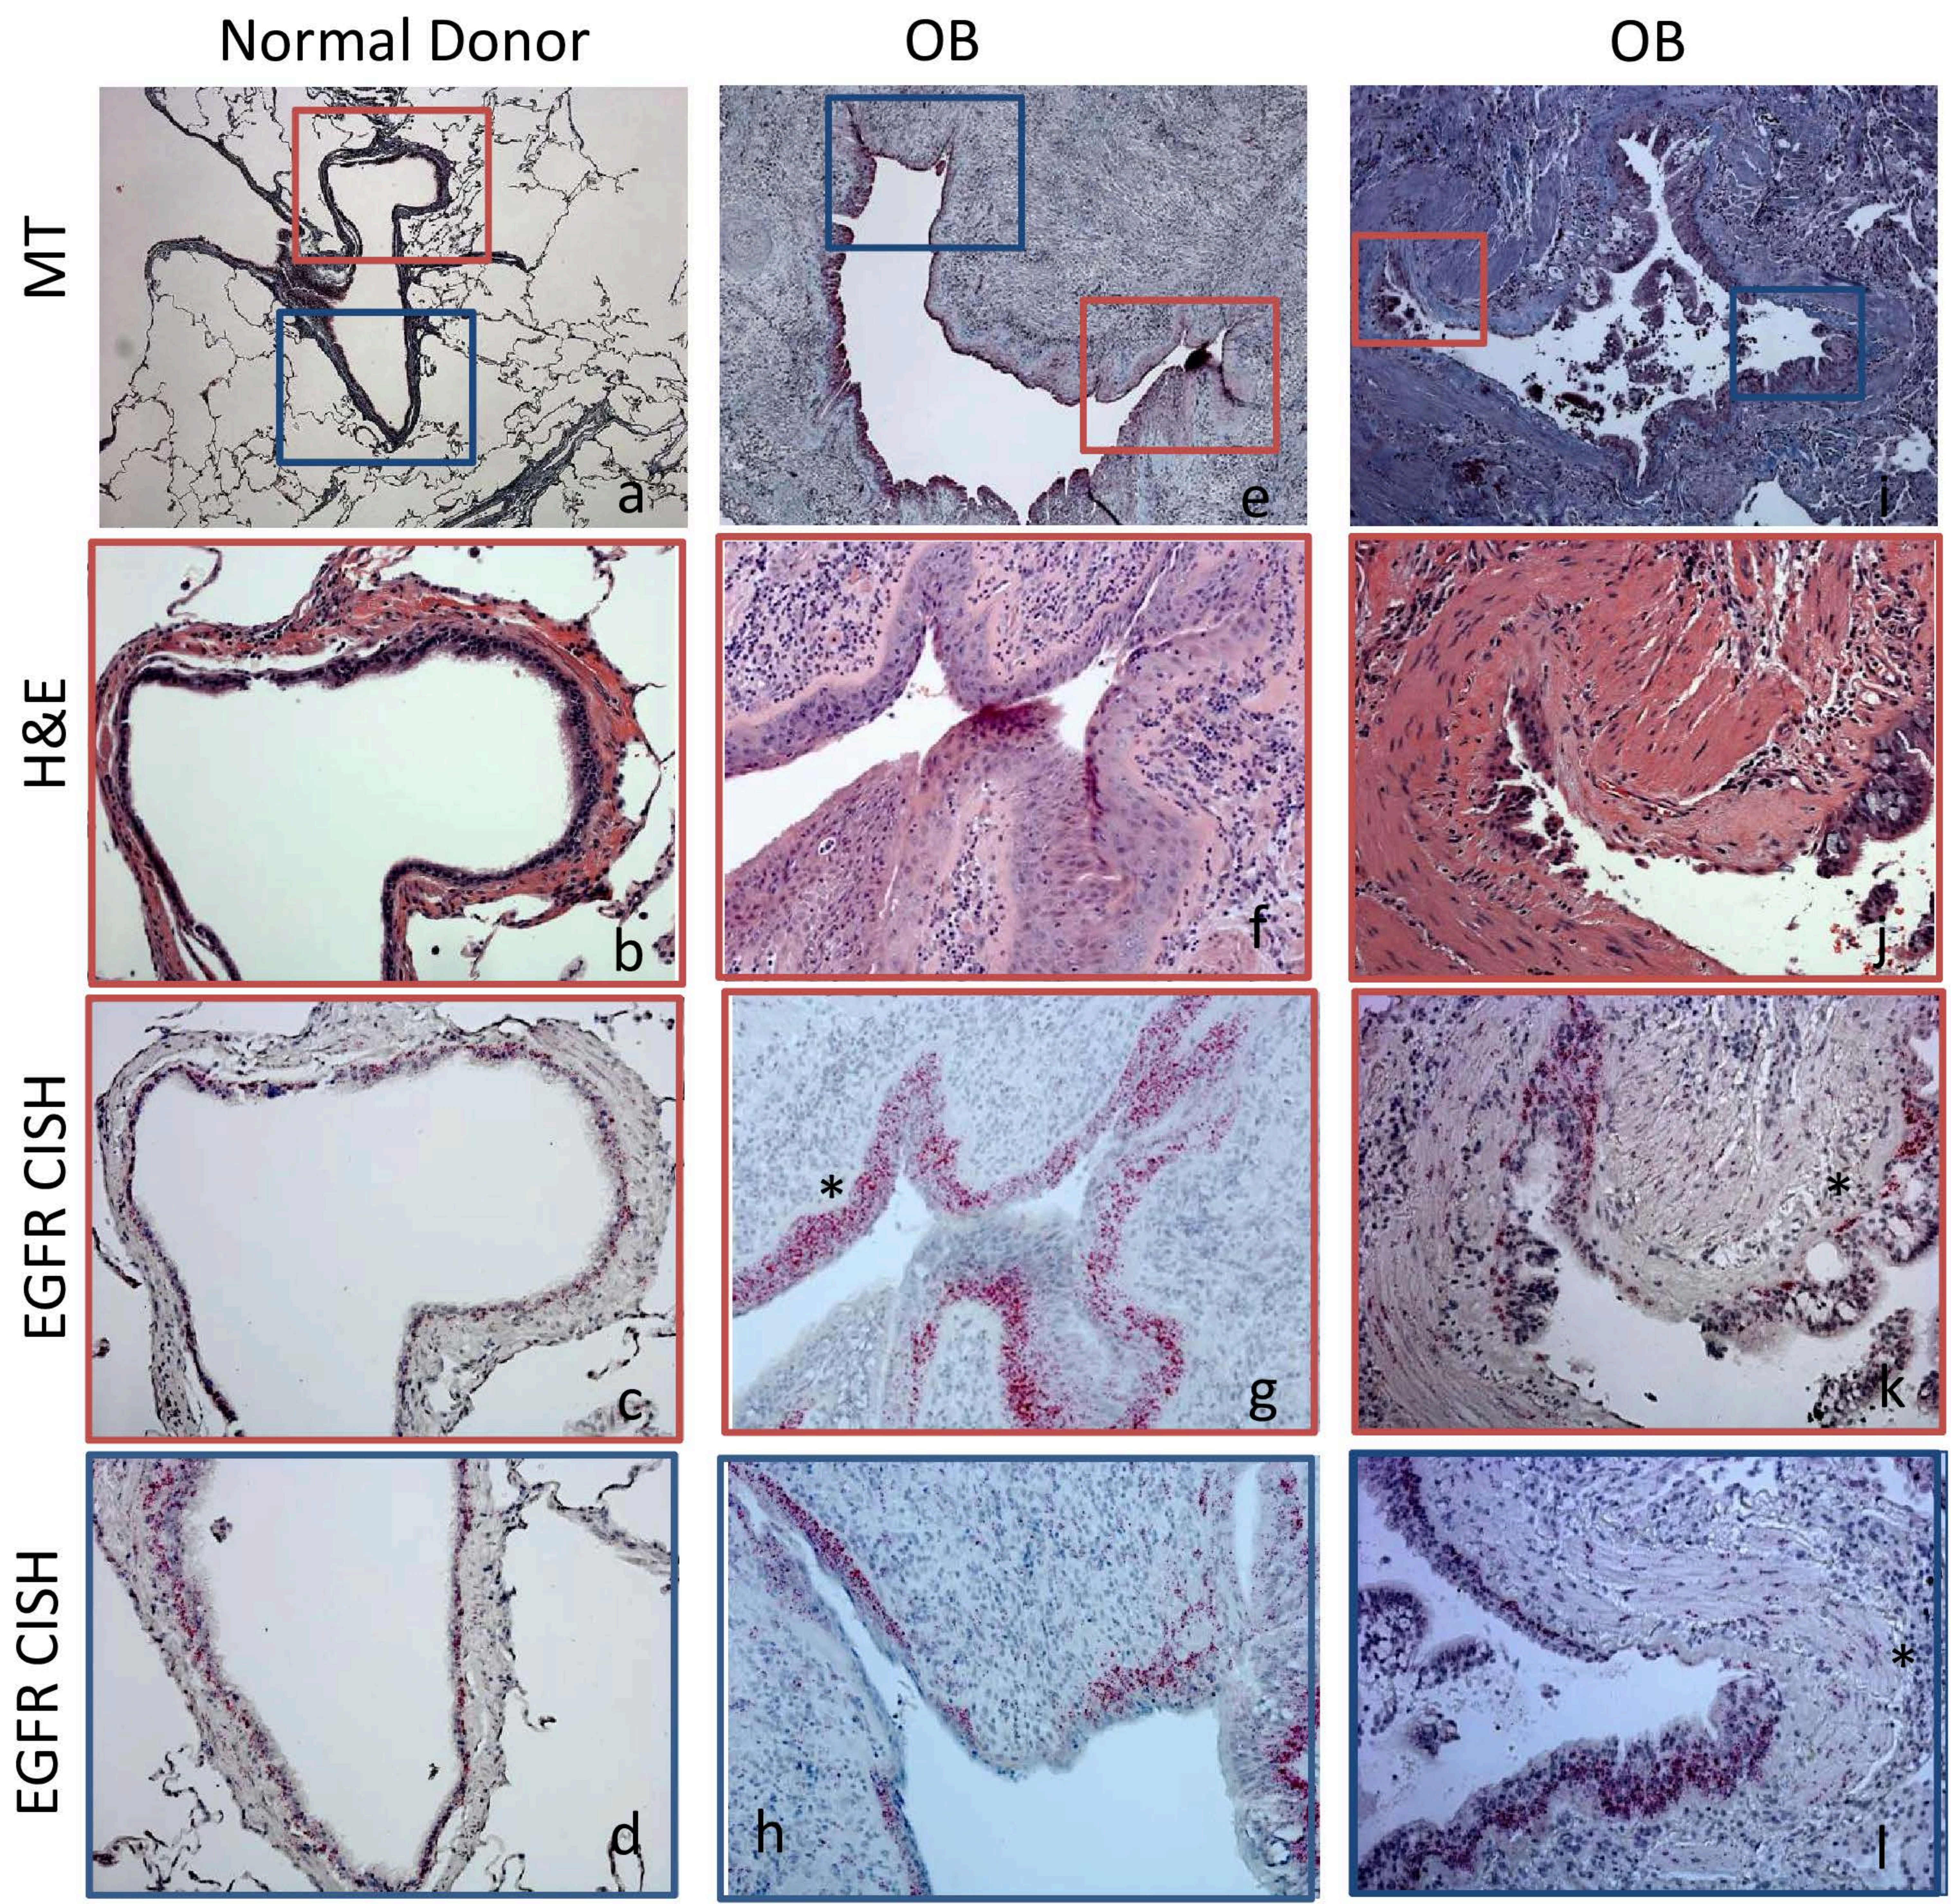

Negative control Probe

Positive (PPIB) control Probe

Normal Donor Tissue

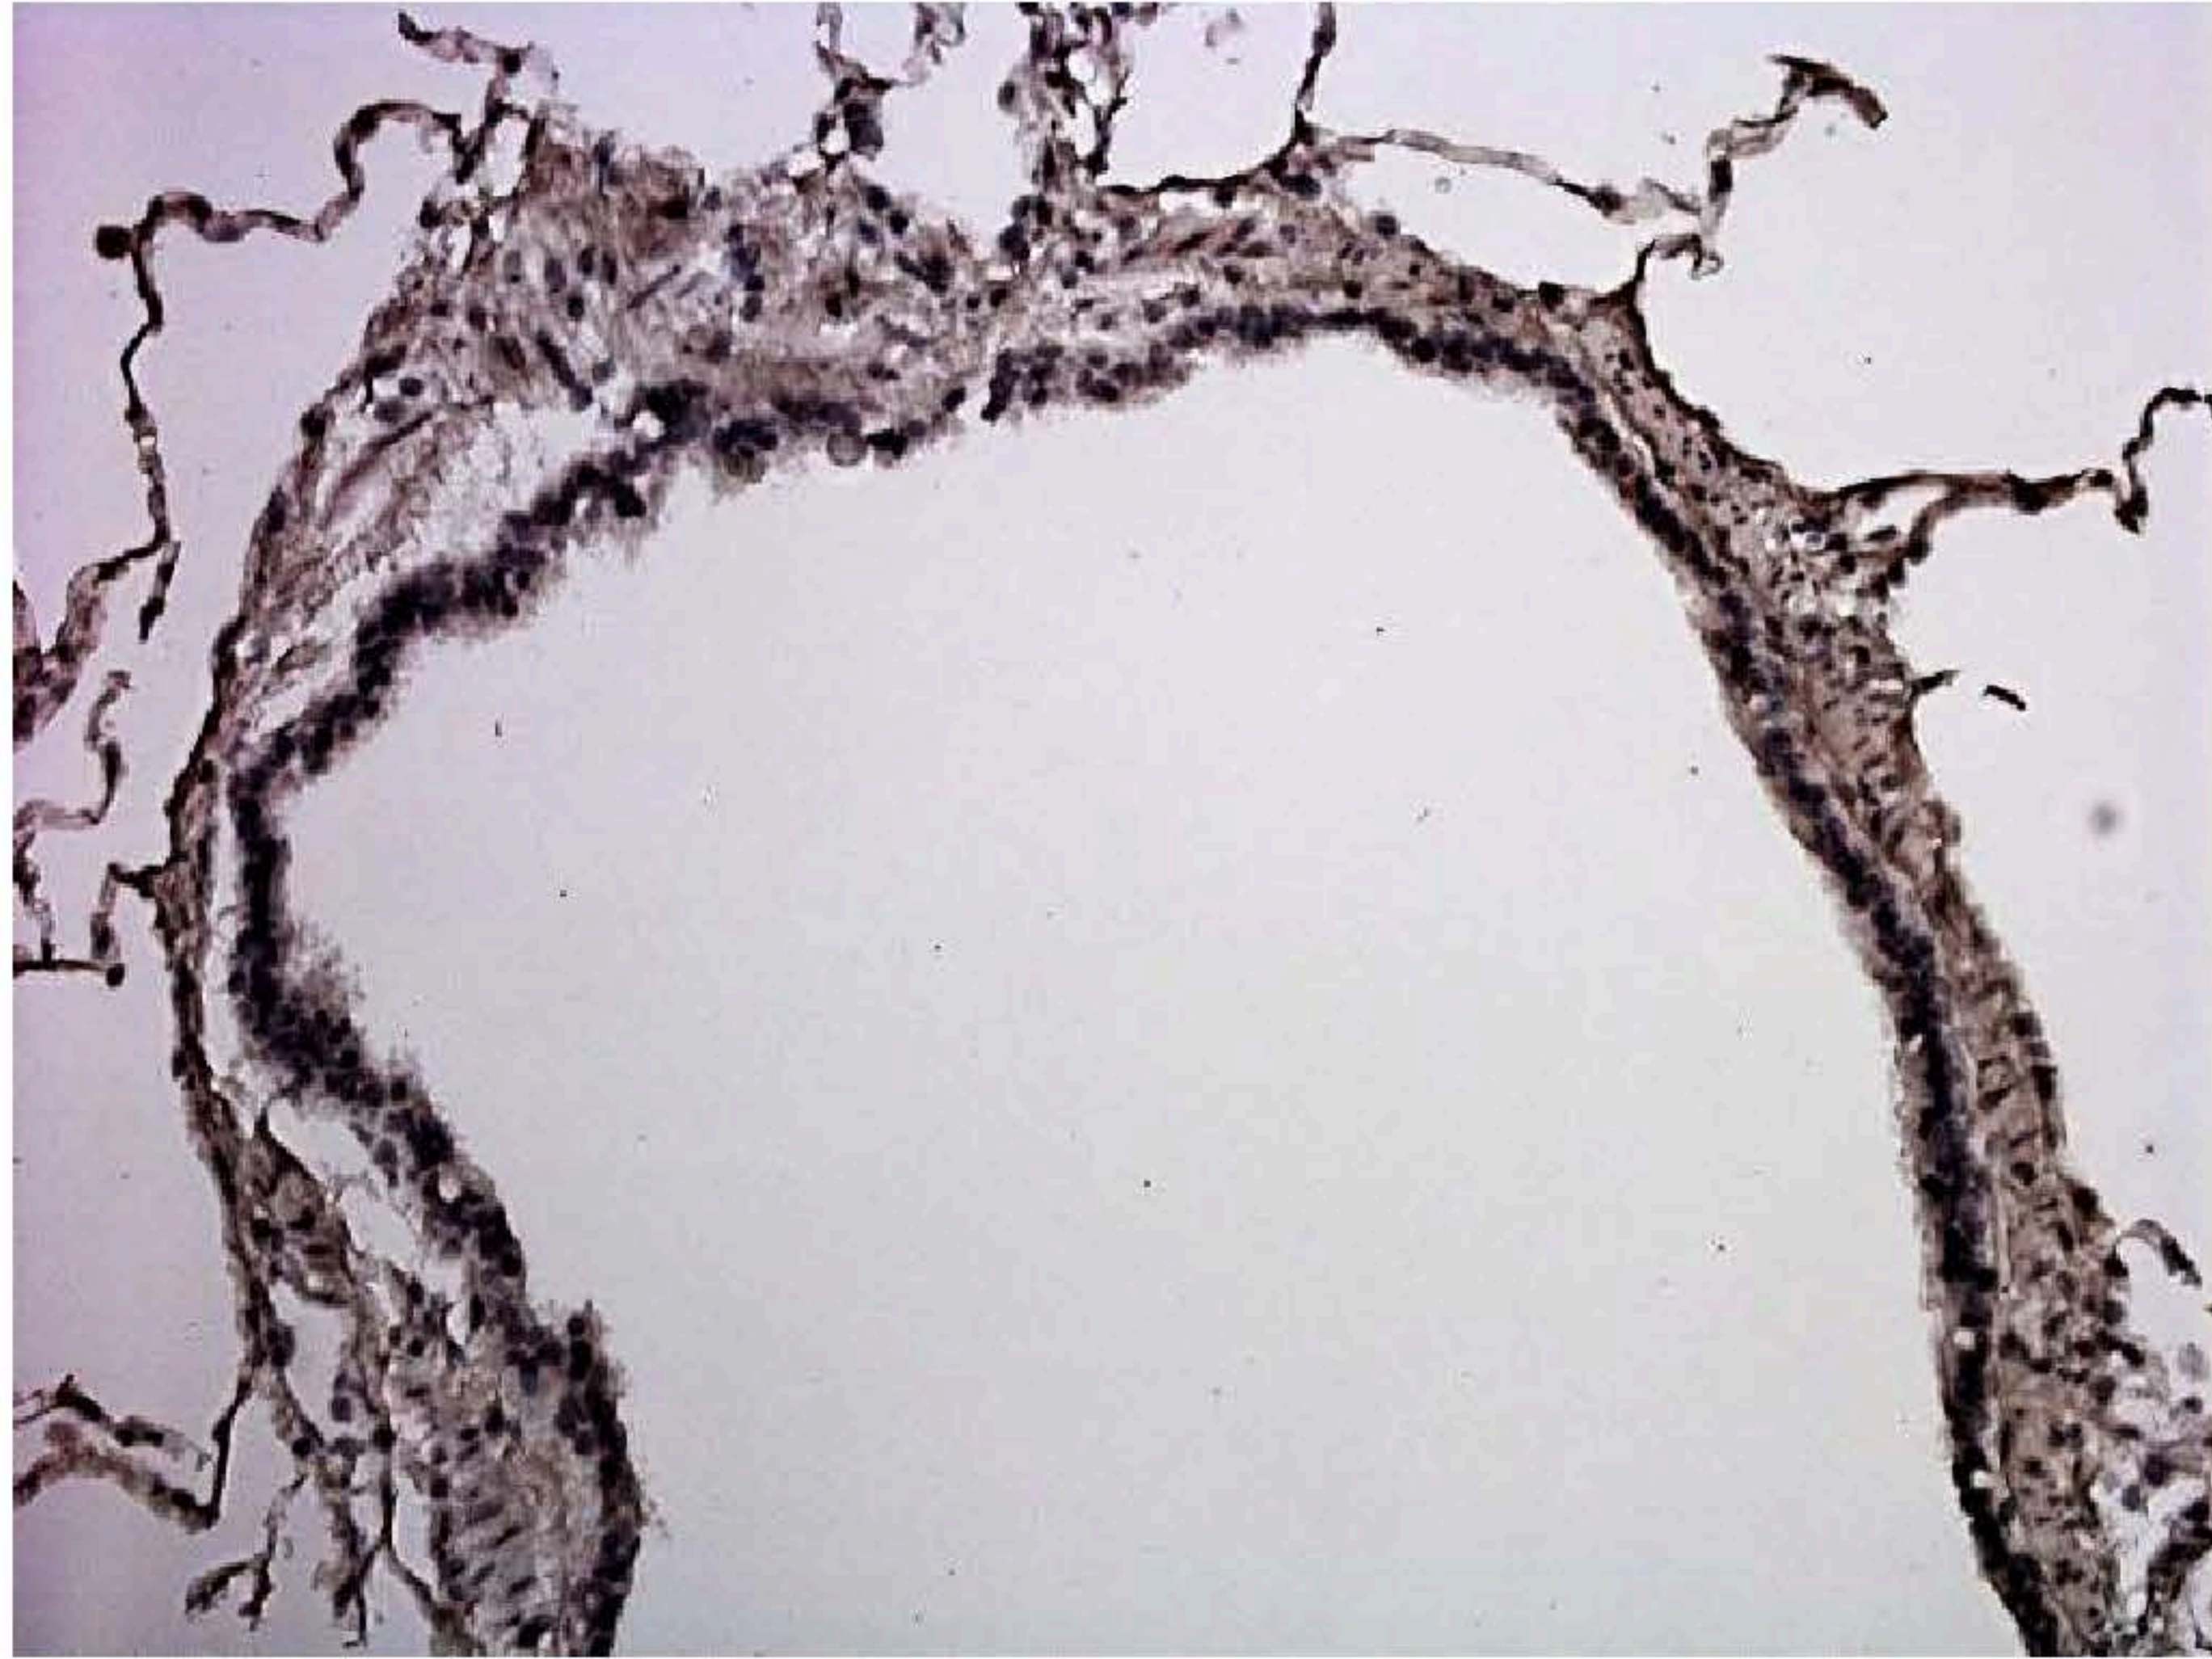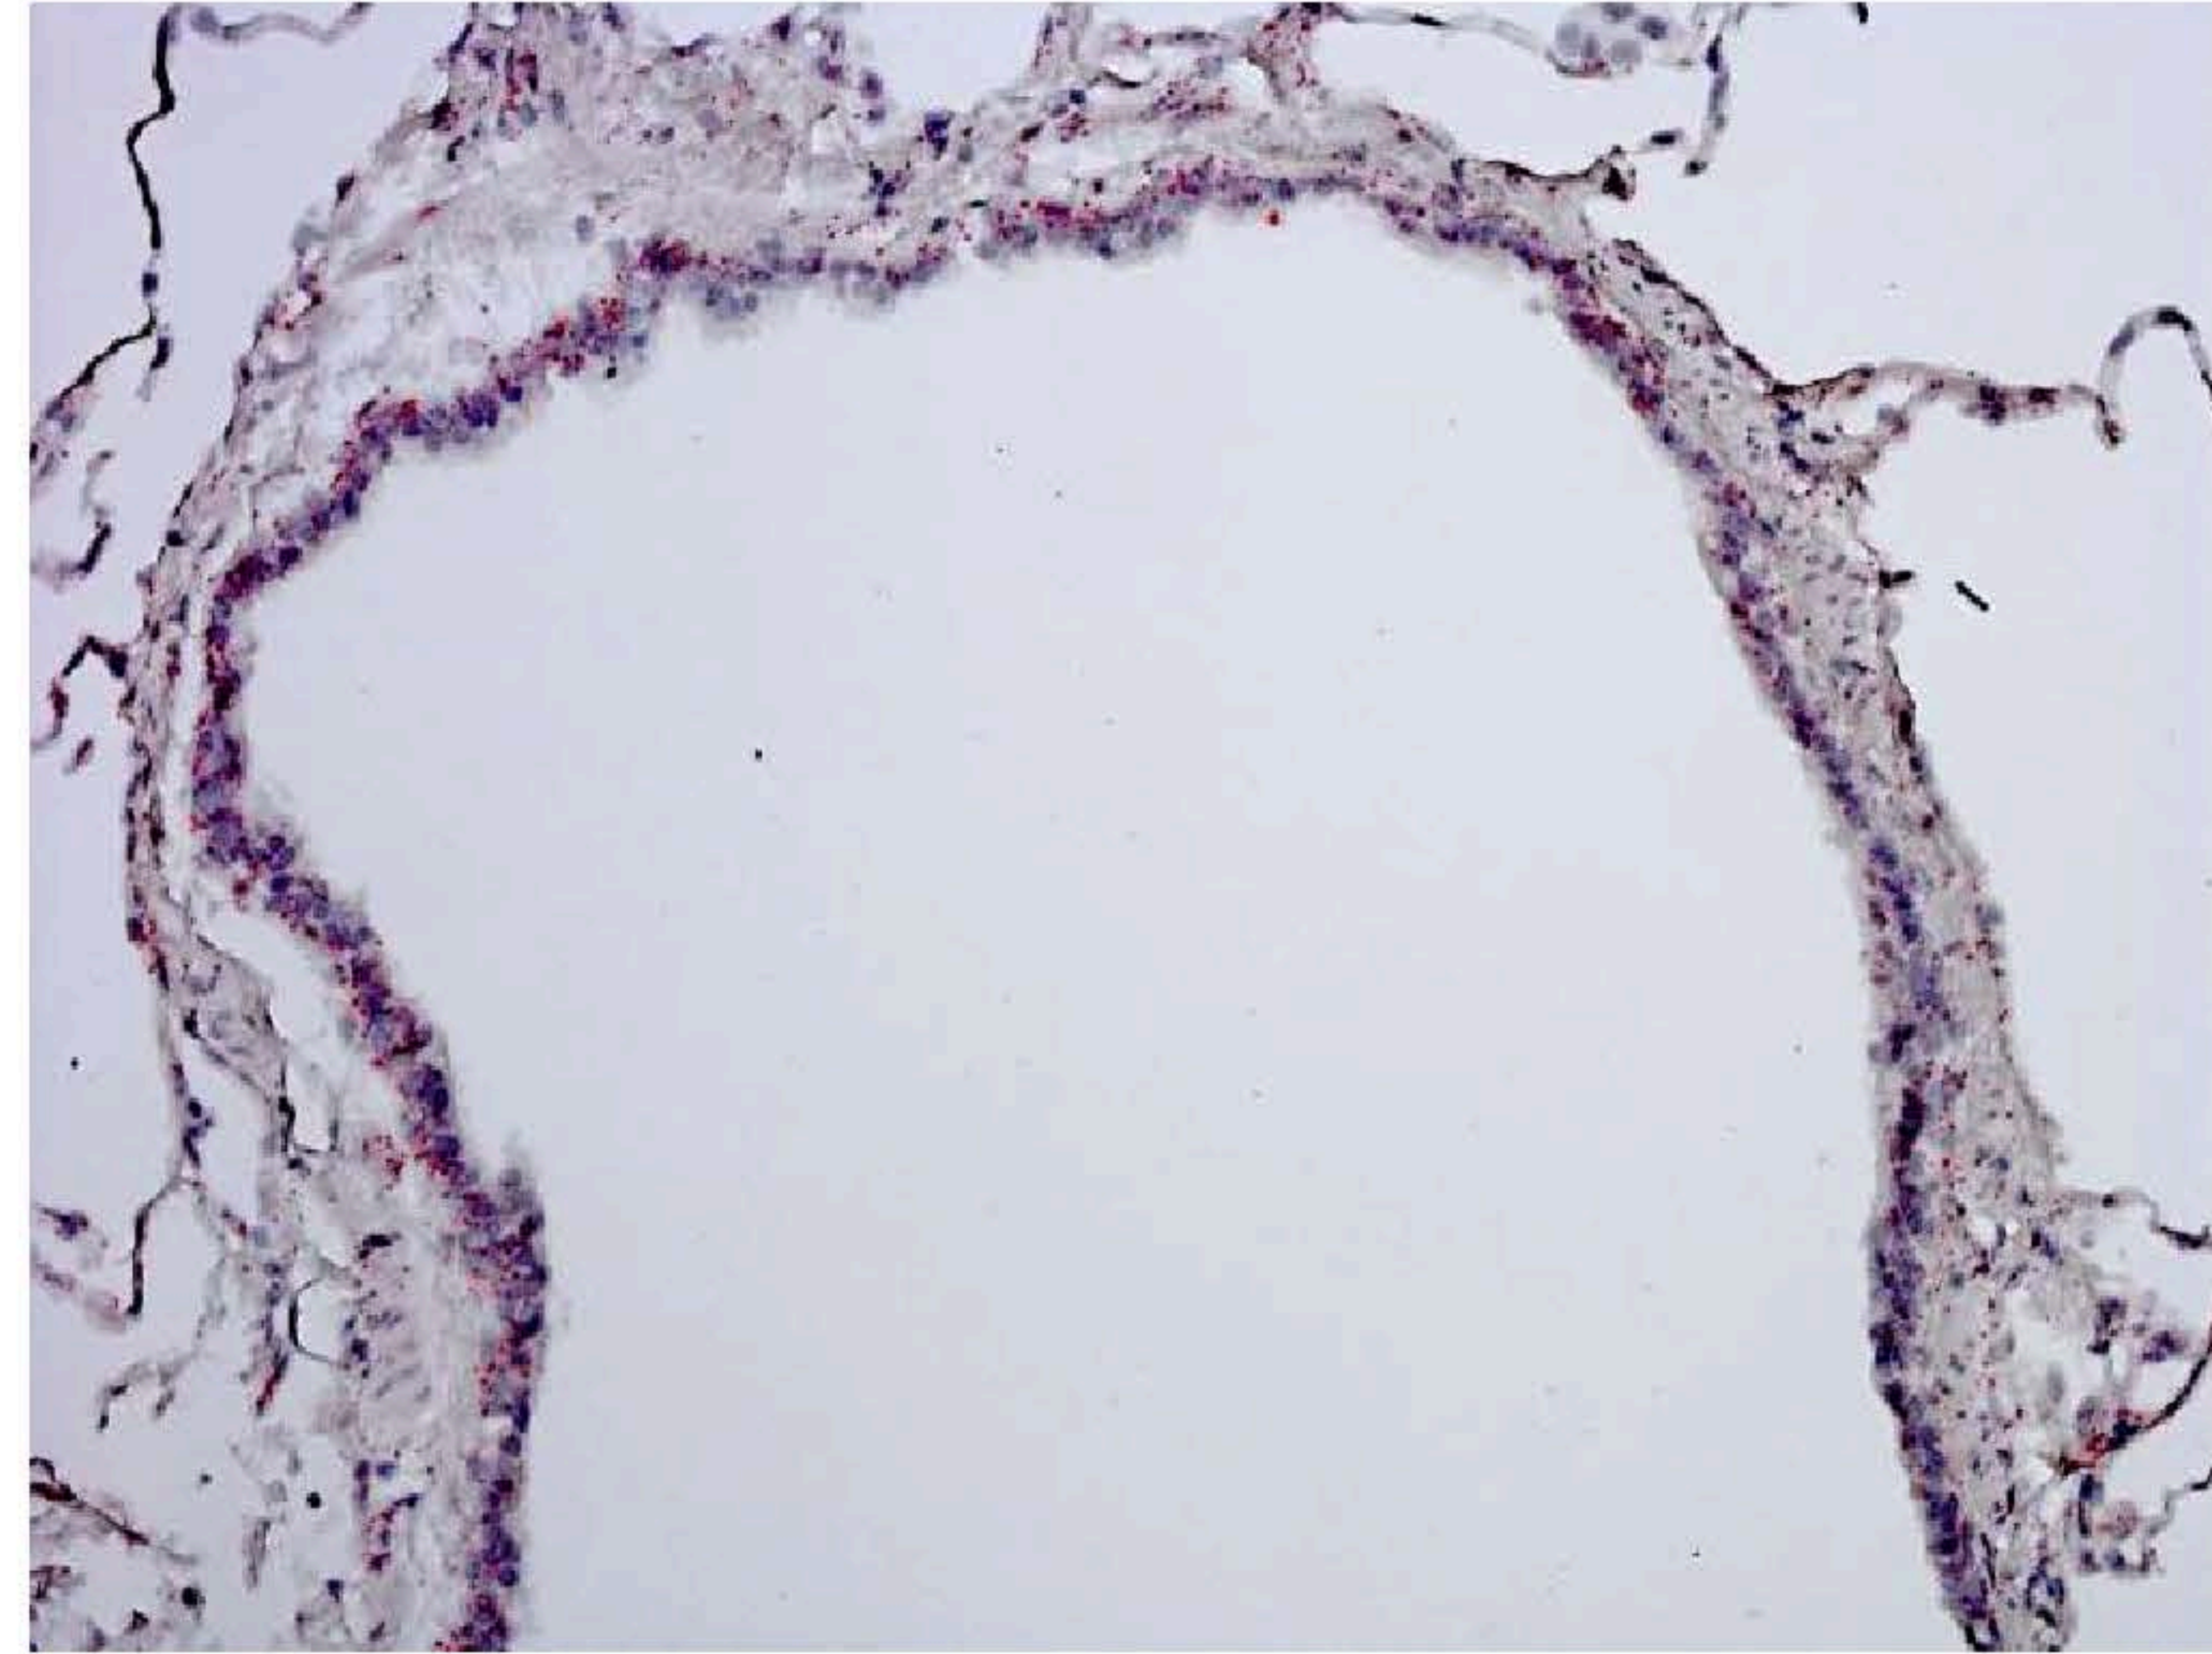

OB Tissue

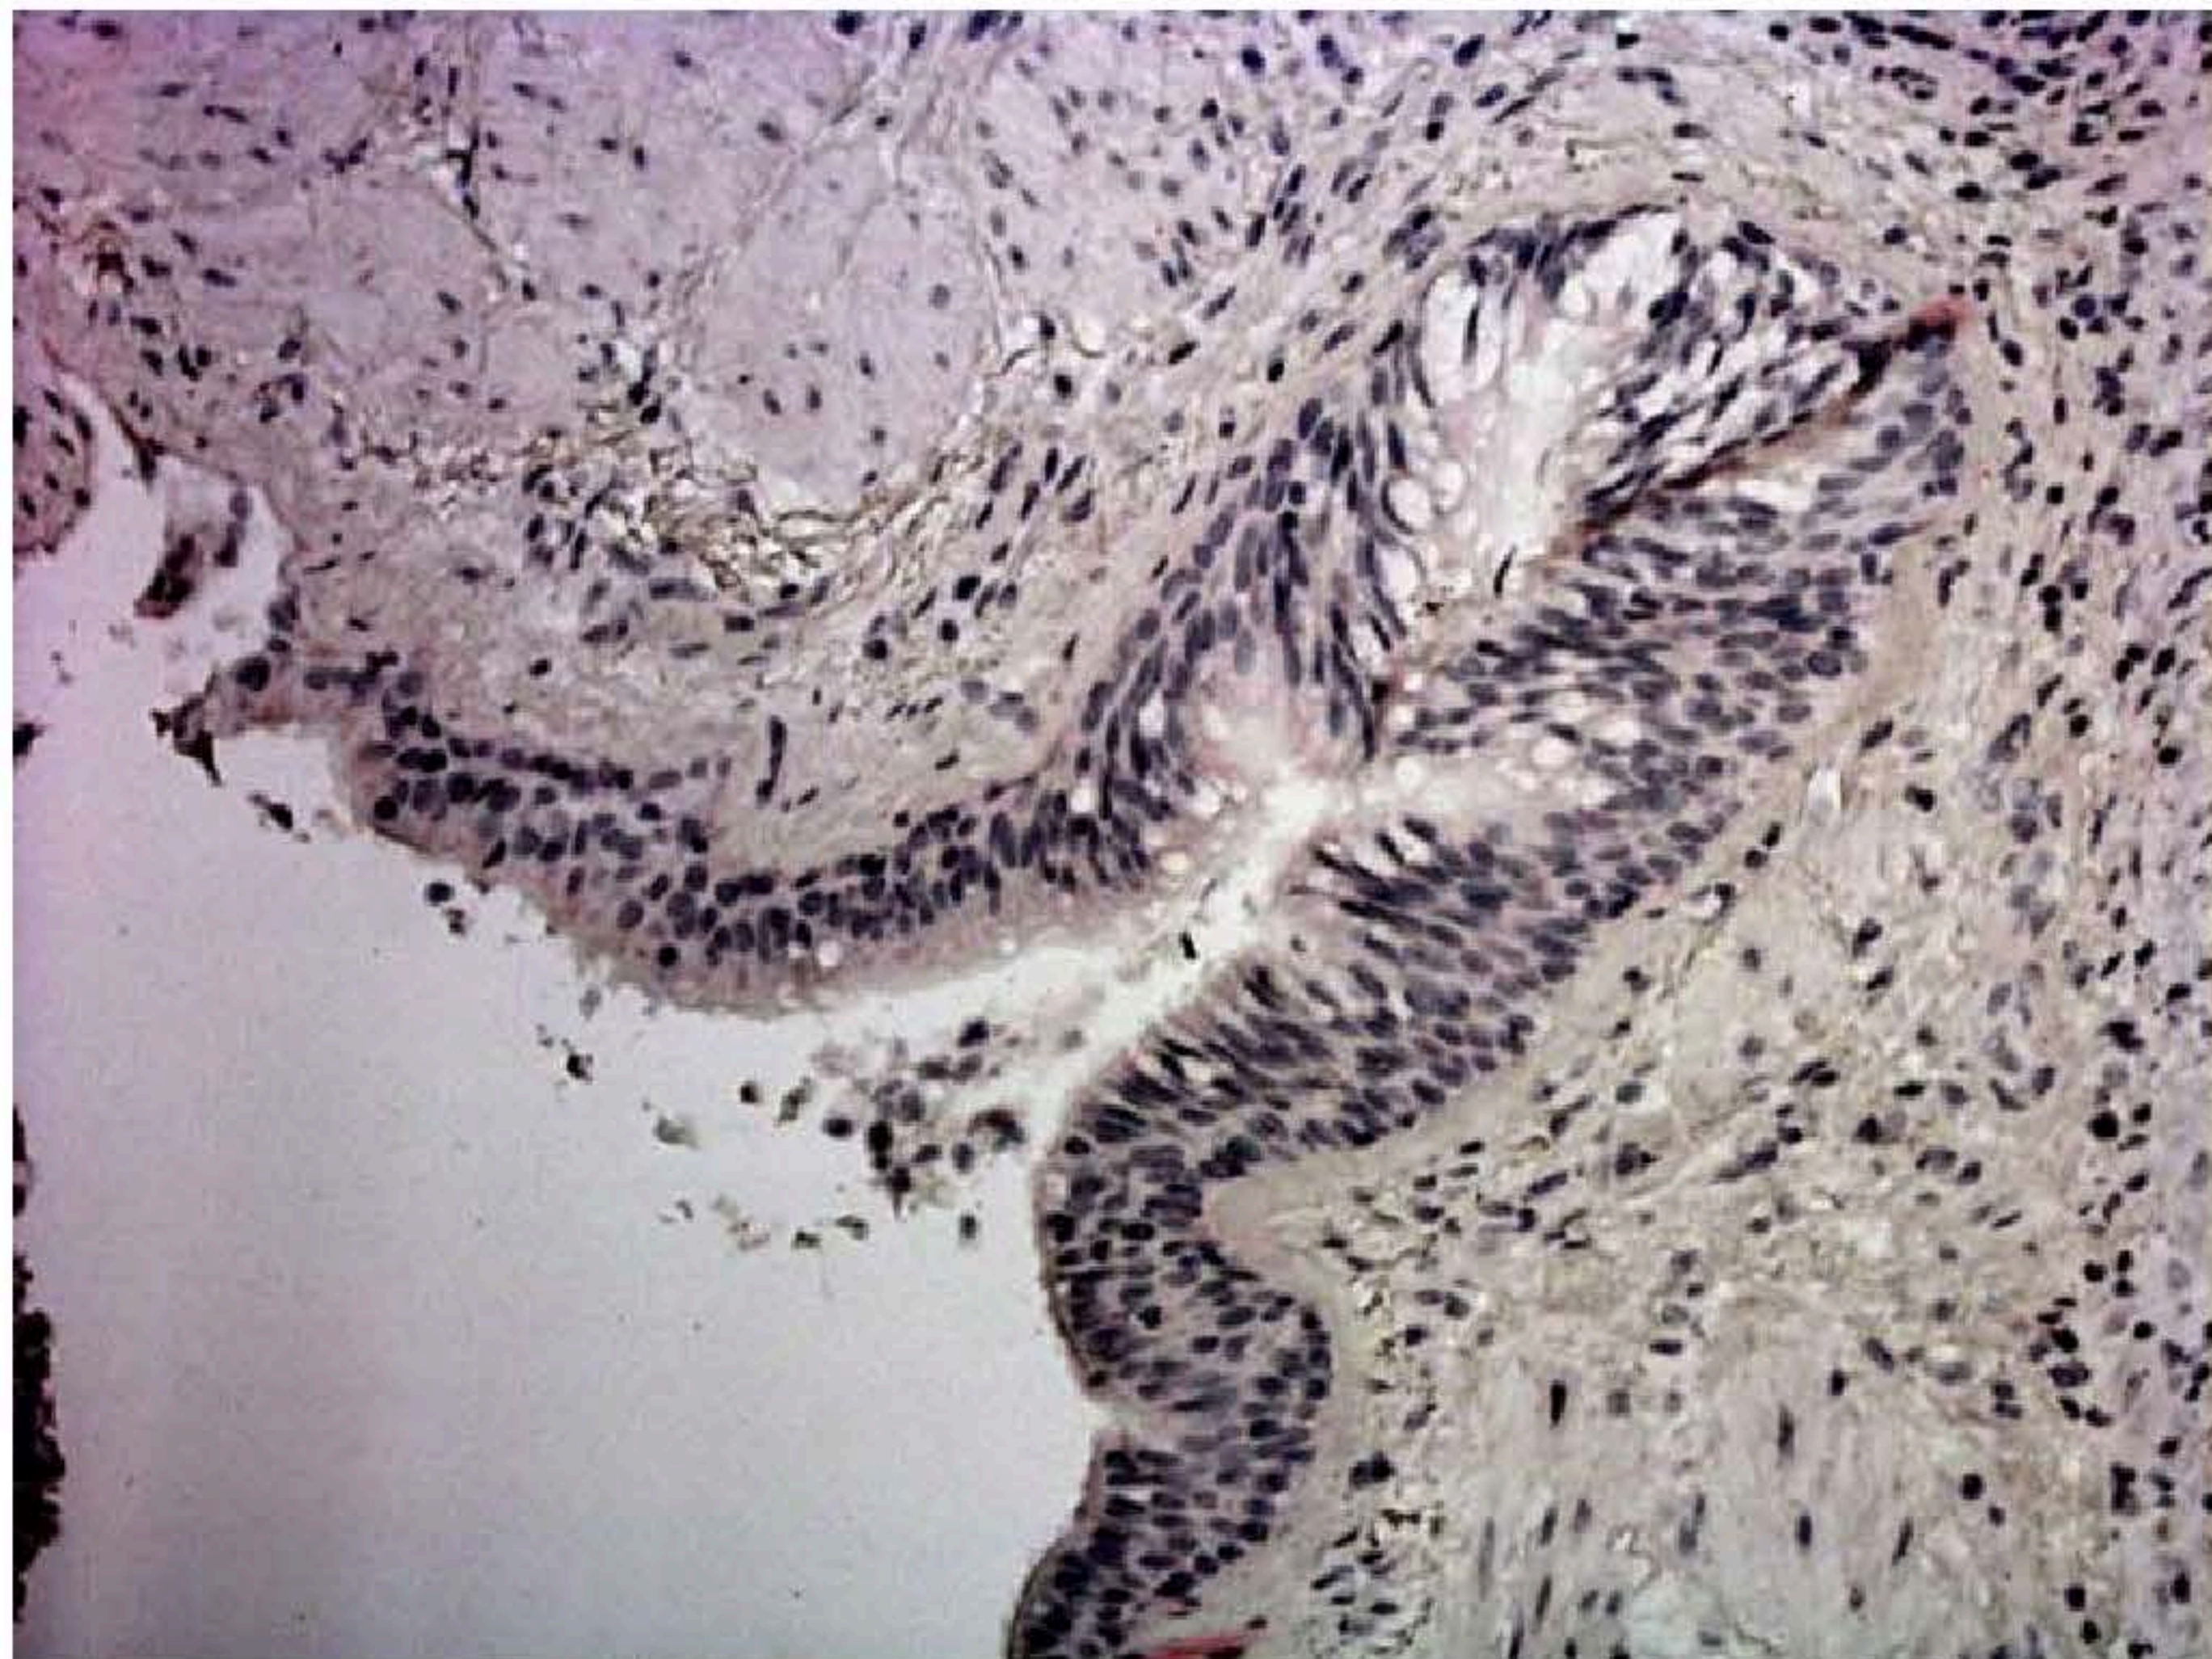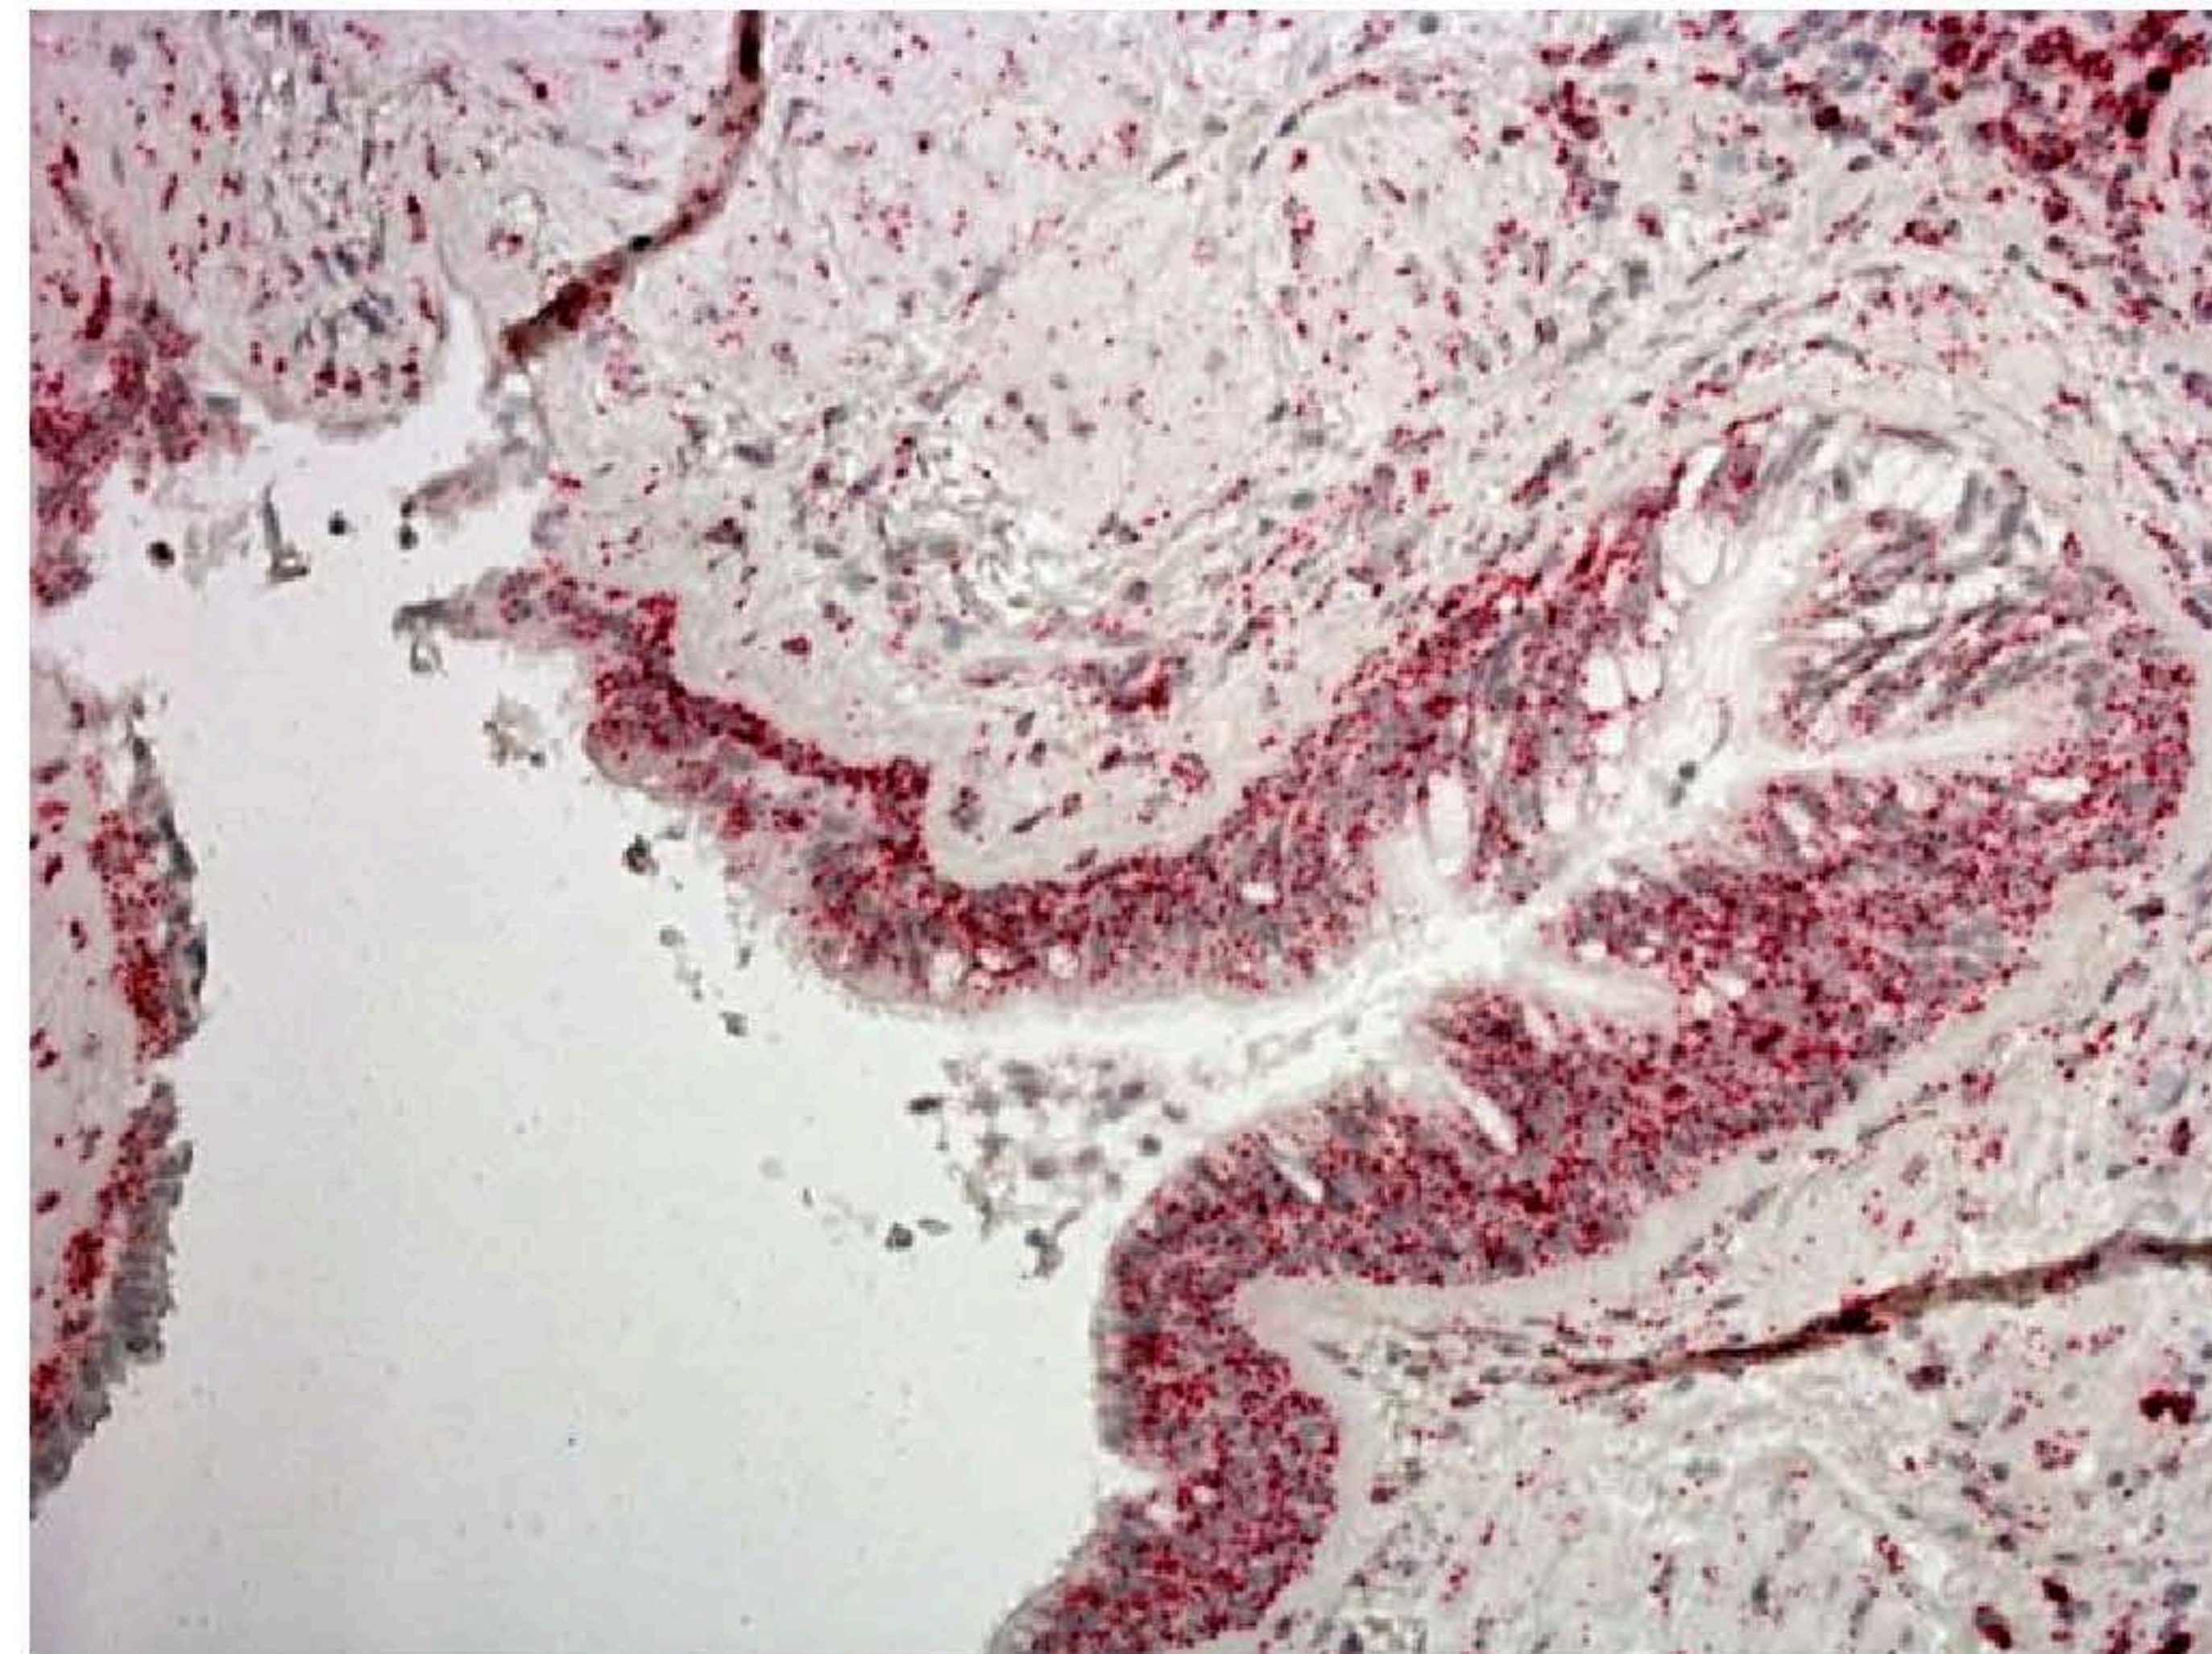

Supplement: NIHMS1057045-supplement-Supp_figS1-4.pdf [file NIHMS1057045-supplement-Supp_figS1-4.pdf]
